# Supplementary material for: Role of local structural distortions in the variation of martensitic transformation temperature with e/a ratio in Ni2Mn1+xZ1−x (Z = In, Sn or Sb) alloys
Source: Royal Society of Chemistry journal article supplement (doi:10.1039/d4cp04014g), 2025-01-01
Supplement: d4cp04014g4.pdf [file d4cp04014g4.pdf]

*Supplementary material to the paper titled*  
**Role of local structural distortions in the variation of martensitic transformation temperature with e/a ratio in Ni<sub>2</sub>Mn<sub>1+x</sub>Z<sub>1-x</sub> (Z = In, Sn or Sb) alloys**

Nafea Manea<sup>1</sup>, Edmund Welter<sup>2</sup> and K R Priolkar<sup>1a1,2</sup>

<sup>11</sup>*School of Physical and Applied Sciences,  
Goa University, Taleigao Plateau, Goa 403206 India*

<sup>22</sup>*Deutsches Elektronen-Synchrotron DESY,  
Notkestr. 85, 22607 Hamburg, Germany*

TABLE I. Lattice parameters obtained from Rietveld fitting for the X-ray diffraction patterns of all the alloys.

| Alloy                                                 | RT Structure    | Lattice parameters                                                                                                                   |
|-------------------------------------------------------|-----------------|--------------------------------------------------------------------------------------------------------------------------------------|
| Ni <sub>2</sub> Mn <sub>1.3</sub> In <sub>0.7</sub>   | L2 <sub>1</sub> | $a = 6.01278(5) \text{ \AA}$                                                                                                         |
| Ni <sub>2</sub> Mn <sub>1.35</sub> In <sub>0.65</sub> | L2 <sub>1</sub> | $a = 6.00701(5) \text{ \AA}$                                                                                                         |
| Ni <sub>2</sub> Mn <sub>1.4</sub> In <sub>0.6</sub>   | 7M              | $a = 4.3892(2) \text{ \AA}, b = 5.6424(2) \text{ \AA}, c = 4.3337(1) \text{ \AA},$<br>$\beta = 92.91(4)^\circ, q = 0.3321(4)c^*$     |
| Ni <sub>2</sub> Mn <sub>1.5</sub> In <sub>0.5</sub>   | 7M              | $a = 4.4024(3) \text{ \AA}, b = 5.5470(4) \text{ \AA}, c = 4.3240(2) \text{ \AA},$<br>$\beta = 94.23(1)^\circ, q = 0.3101(3)c^*$     |
| Ni <sub>2</sub> Mn <sub>1.33</sub> Sn <sub>0.67</sub> | L2 <sub>1</sub> | $a = 6.01203(8) \text{ \AA}$                                                                                                         |
| Ni <sub>2</sub> MnSb                                  | L2 <sub>1</sub> | $a = 6.00053(4) \text{ \AA}$                                                                                                         |
| Ni <sub>2</sub> Mn <sub>1.6</sub> Sn <sub>0.4</sub>   | 7M              | $a = 4.3003(12) \text{ \AA}, b = 5.6202(19) \text{ \AA}, c = 4.3110(12) \text{ \AA},$<br>$\beta = 90.33(5)^\circ, q = 0.2874(45)c^*$ |
| Ni <sub>2</sub> Mn <sub>1.65</sub> Sb <sub>0.35</sub> | 7M &            | $a = 4.2997(18) \text{ \AA}, b = 5.6089(22) \text{ \AA}, c = 4.2916(35) \text{ \AA}$<br>$\beta = 90.54(1)^\circ, q = 0.3055(54)c^*$  |

<sup>a</sup> Author to whom correspondence should be addressed

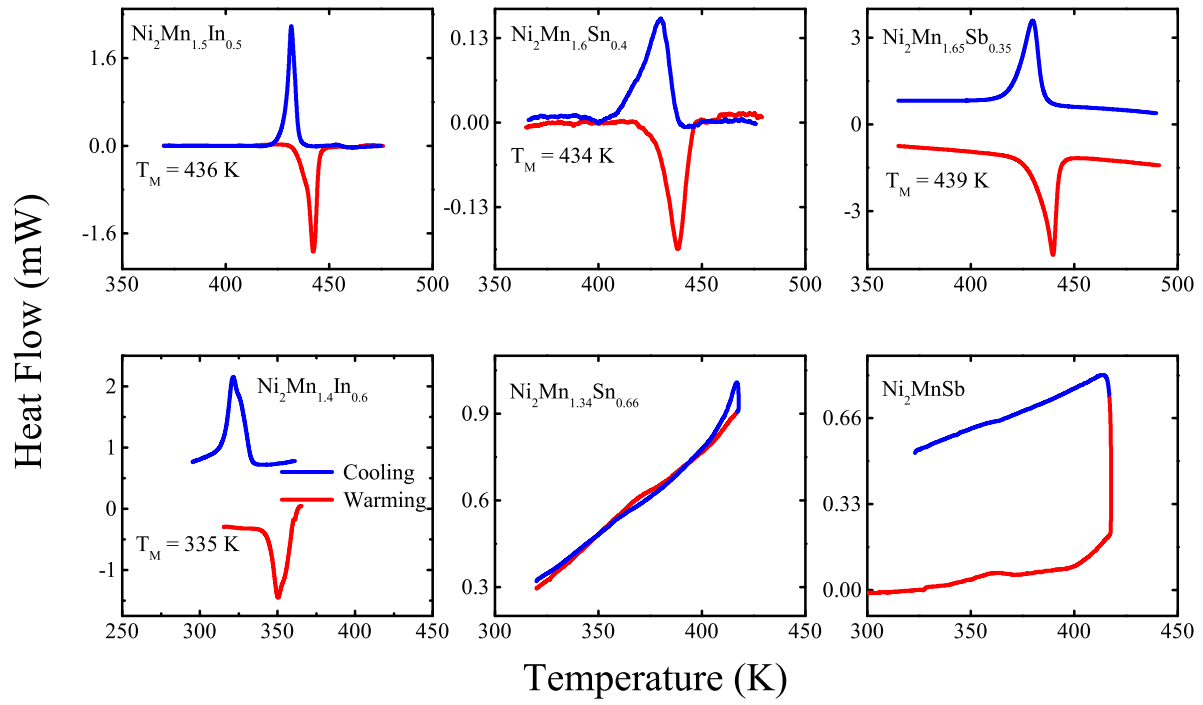

FIG. 1. DSC thermograms of  $\text{Ni}_2\text{Mn}_{1.5}\text{In}_{0.5}$ ,  $\text{Ni}_2\text{Mn}_{1.4}\text{In}_{0.6}$ ,  $\text{Ni}_2\text{Mn}_{1.6}\text{Sn}_{0.4}$ ,  $\text{Ni}_2\text{Mn}_{1.34}\text{Sn}_{0.66}$ ,  $\text{Ni}_2\text{Mn}_{1.65}\text{Sb}_{0.35}$  and  $\text{Ni}_2\text{MnSb}$ .

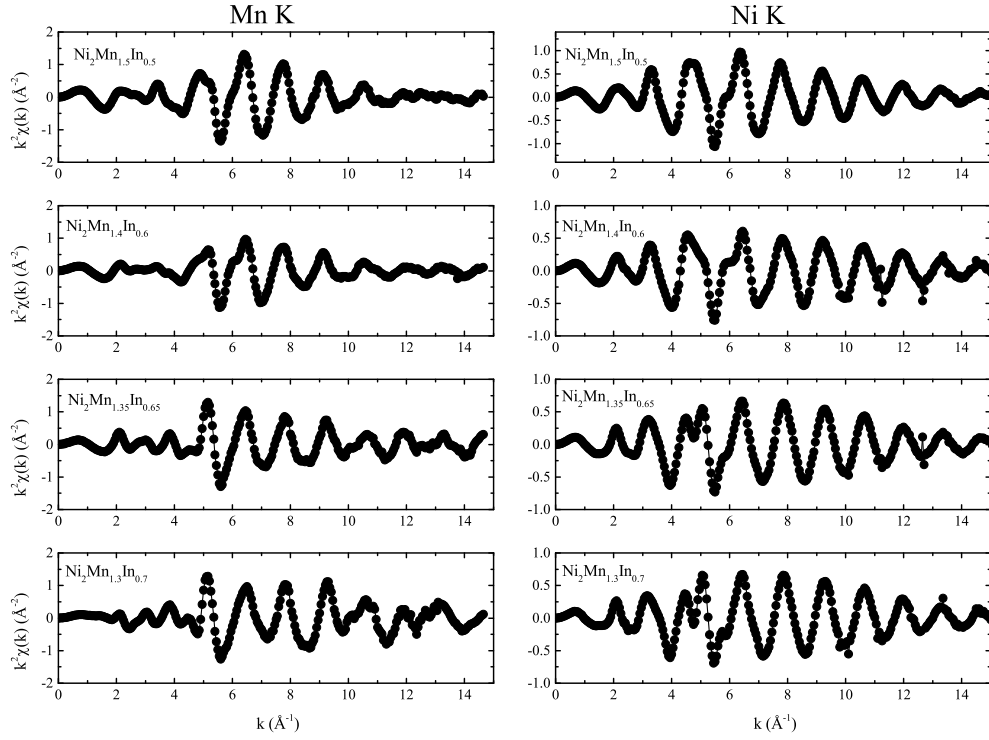

FIG. 2.  $k^2$  weighted Mn and Ni EXAFS of  $\text{Ni}_2\text{Mn}_{1.5}\text{In}_{0.5}$ ,  $\text{Ni}_2\text{Mn}_{1.4}\text{In}_{0.6}$ ,  $\text{Ni}_2\text{Mn}_{1.35}\text{In}_{0.65}$  and  $\text{Ni}_2\text{Mn}_{1.3}\text{In}_{0.7}$ . This data in the range  $k = 3$  to  $14 \text{ \AA}^{-1}$  was Fourier transformed to  $R$ -space and fitted with a structural model.

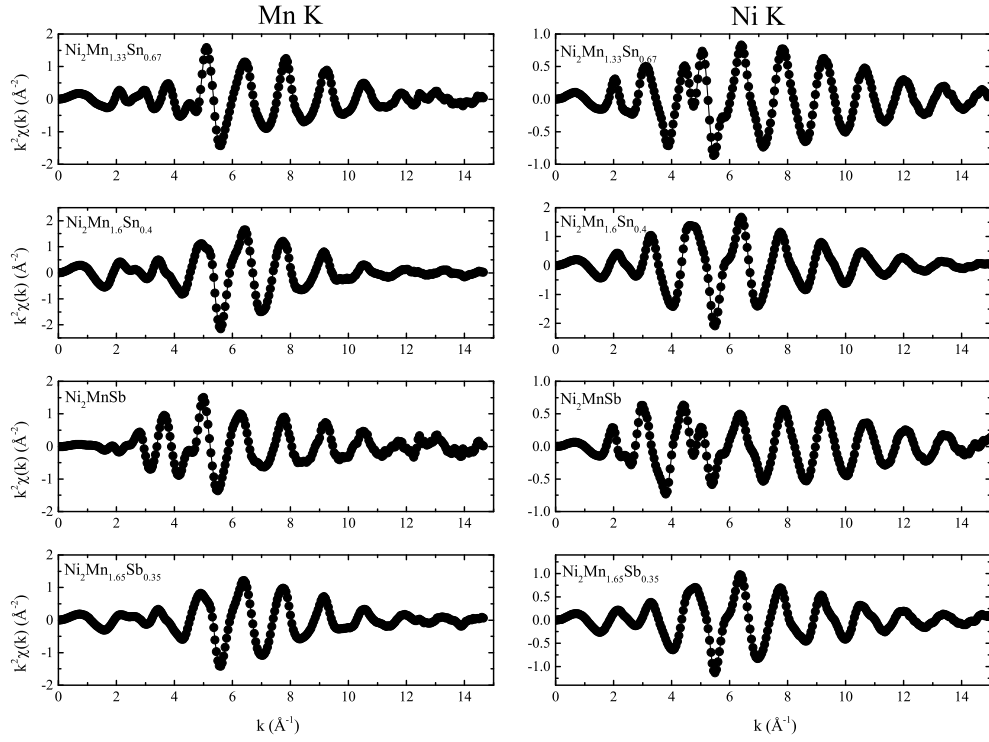

FIG. 3.  $k^2$  weighted Mn and Ni EXAFS of  $\text{Ni}_2\text{Mn}_{1.6}\text{Sn}_{0.4}$ ,  $\text{Ni}_2\text{Mn}_{1.34}\text{Sn}_{0.66}$ ,  $\text{Ni}_2\text{MnSb}$  and  $\text{Ni}_2\text{Mn}_{1.65}\text{Sb}_{0.35}$ . This data in the range  $k = 3$  to  $14 \text{ \AA}^{-1}$  was Fourier transformed to  $R$ -space and fitted with a structural model.

TABLE II. Fitting parameters used in fitting Mn and Ni EXAFS data in  $\text{Ni}_2\text{Mn}_{1+x}\text{Z}_{1-x}$  ( $Z = \text{In}, \text{Sn}, \text{Sb}$ ) alloys. Each path has three unique parameters representing coordination number (CN), change in path length ( $\Delta R$ ) and mean square radial displacement ( $\sigma^2$ ). Additionally there are two common parameters, Amplitude reduction factor,  $S_0^2$  and  $\Delta E_0$ .  $S_0^2$  for Mn and Ni were estimated from fitting the respective metal foils and were kept fixed. CNs were also kept fixed to their bulk crystallographic values. A total of 14 parameters were varied in a single fit consisting both, Mn and Ni EXAFS data set.

| Mn EXAFS           |            |            | Ni EXAFS     |            |            |
|--------------------|------------|------------|--------------|------------|------------|
| $\Delta E_0$       | e-Mn       |            | $\Delta E_0$ | e-Ni       |            |
| Path               | $\Delta R$ | $\sigma^2$ | Path         | $\Delta R$ | $\sigma^2$ |
| Mn-Ni              | delr1      | ss1        | Ni-Mn        | delr1      | ss1        |
| Mn-Z               | delr2      | ss2        | Ni-Z         | delr5      | ss5        |
| Mn-Mn <sub>Z</sub> | delr3      | ss3        | Ni-Ni        | delr6      | ss6        |
| Mn-Mn              | delr4      | ss4        |              |            |            |
